# Supplementary material for: Psychological Impact of COVID-19 in the Setting of Dentistry: A Review Article
Source: MDPI journal article supplement (doi:10.3390/ijerph192316216), 2022-12-04
Supplement: s1 [file s1]

**Supplementary Material S1.** Modified Newcastle-Ottawa Scale (NOS). Adaptation for cross-sectional studies based on surveys

*Selection (Maximum 3 stars)*

**1. Representativeness of the sample**

- a) Truly representative of the average in the target population. \* (all subjects or random sampling)
- b) Somewhat representative of the average in the target population. \* (non-random sampling)
- c) Selected group of users.
- d) No description of the sampling strategy.

**2. Sample size**

- a) Justified and satisfactory. \*
- b) Not justified.

**3. Non-respondents**

- a) Comparability between respondents and non-respondents characteristics is established, and the response rate is satisfactory. \*
- b) The response rate is unsatisfactory, or the comparability between respondents and non-respondents is unsatisfactory.
- c) No description of the response rate or the characteristics of the responders and the non-responders.

*Comparability (Maximum 2 stars)*

**1. The subjects in different outcome groups are comparable, based on the study design or analysis. Confounding factors are controlled.**

- a) The study controls for the most important factor (select one). \*
- b) The study control for any additional factor. \*

*Outcome (Maximum 5 stars)*

**1. Assessment of the outcome I**

- a) Independent blind assessment. \*\*
- b) Record linkage. \*\*
- c) Self-report. \*
- d) No description.

**2. Assessment of the outcome II**

- a) Validated measurement tool. \*\*
- b) Non-validated measurement tool, but the tool is available or described. \*
- c) No description of the measurement tool.

**4. Statistical test**

- a) The statistical test used to analyze the data is clearly described and appropriate, and the measurement of the association is presented, including confidence intervals and the probability level (p value). \*

- b) The statistical test is not appropriate, not described or incomplete.

*Score*

**Very Good quality:** 9 · 10 stars.

**Good quality:** 7 · 8 stars.

**Satisfactory quality:** 5 · 6 stars.

**Unsatisfactory quality:** <5 stars.

This scale has been adapted from the Newcastle-Ottawa Quality Assessment Scale for cohort studies. An additional adaptation has been done for this study: the point 4 of 'Selection' section is referred to the validity of measurement tool. The studies selected in this review used the tools to evaluate the psychological impact as a result (consequence of the COVID-19 pandemic) and not as an exposure. So, this point was moved to 'Outcome' section (Assessment of the outcome II).

**Table S1.** Number of studies from each country.

| Country        | Total number of studies | Studies on dental professionals | Studies on dental patients |
|----------------|-------------------------|---------------------------------|----------------------------|
| Australia      | 1                       | 1                               | 0                          |
| Brazil         | 10                      | 6                               | 4                          |
| Cambodia       | 1                       | 1                               | 0                          |
| Canada         | 1                       | 1                               | 0                          |
| China          | 8                       | 4                               | 4                          |
| Czech Republic | 1                       | 1                               | 0                          |
| Ecuador        | 1                       | 1                               | 0                          |
| Egypt          | 2                       | 1                               | 1                          |
| France         | 1                       | 1                               | 0                          |
| Germany        | 5                       | 4                               | 1                          |
| Hungary        | 1                       | 1                               | 0                          |
| India          | 20                      | 17                              | 3                          |
| Indonesia      | 2                       | 1                               | 1                          |
| Iran           | 3                       | 2                               | 1                          |
| Iraq           | 2                       | 1                               | 1                          |
| Israel         | 2                       | 1                               | 1                          |
| Italy          | 11                      | 7                               | 4                          |
| Jordan         | 2                       | 1                               | 1                          |
| Kuwait         | 1                       | 1                               | 0                          |
| Malaysia       | 2                       | 2                               | 0                          |

**Table S1.** Continued.

| Country              | Total number of studies | Studies on dental professionals | Studies on dental patients |
|----------------------|-------------------------|---------------------------------|----------------------------|
| Nigeria              | 1                       | 0                               | 1                          |
| Norway               | 1                       | 1                               | 0                          |
| Oman                 | 1                       | 1                               | 0                          |
| Pakistan             | 7                       | 6                               | 1                          |
| Peru                 | 1                       | 1                               | 0                          |
| Poland               | 4                       | 2                               | 2                          |
| Qatar                | 1                       | 1                               | 0                          |
| Romania              | 1                       | 1                               | 0                          |
| Russia               | 1                       | 1                               | 0                          |
| Saudi Arabia         | 12                      | 8                               | 4                          |
| Spain                | 5                       | 1                               | 4                          |
| Syria                | 1                       | 0                               | 1                          |
| Taiwan               | 1                       | 1                               | 0                          |
| Trinidad & Tobago    | 1                       | 1                               | 0                          |
| Turkey               | 13                      | 8                               | 5                          |
| United Arab Emirates | 2                       | 2                               | 0                          |
| United Kingdom       | 9                       | 9                               | 0                          |
| United States        | 6                       | 2                               | 4                          |
| Venezuela            | 1                       | 1                               | 0                          |

**Table S2.** Vaccination and pandemic moment of the studies on dental professionals.

| First author / Publication year         | Study location                                                     | Period of data collection                                        | Vaccination process started (Yes/No) | Pandemic moment                            |
|-----------------------------------------|--------------------------------------------------------------------|------------------------------------------------------------------|--------------------------------------|--------------------------------------------|
| Ahmed, M.A. et al. / 2020 [15]          | 30 countries worldwide<br>Most from Pakistan (30.8%)               | From 10 <sup>th</sup> to 17 <sup>th</sup> March 2020             | No                                   | No cases or deaths in Pakistan             |
| Ajwa, N. et al. / 2020 [16]             | Saudi Arabia                                                       | From June to August 2020                                         | No                                   | Second wave; high mortality                |
| Aldhuwayhi S. et al. / 2021 [17]        | Saudi Arabia                                                       | 2020                                                             | No                                   | Unknown                                    |
| Alencar C. de M. et al. / 2021 [18]     | Brazil                                                             | From 11 <sup>th</sup> to 30 <sup>th</sup> July 2020              | No                                   | First wave; high mortality                 |
| Alkhalifah F.N. et al. / 2021 [19]      | Saudi Arabia                                                       | From 15 <sup>th</sup> to 28 <sup>th</sup> May 2020               | No                                   | First wave; rising mortality               |
| Aly, M.M.; Elchaghaby, M.A. / 2020 [20] | Egypt                                                              | 2020                                                             | No                                   | Unknown                                    |
| Amato A. et al. / 2021 [21]             | Italy                                                              | From April 26 <sup>th</sup> to May 3 <sup>rd</sup> 2020          | No                                   | First wave; high mortality                 |
| Aurlene N. et al. / 2021 [22]           | India                                                              | From June to September 2020                                      | No                                   | First wave; high mortality                 |
| Balkaran R. et al. / 2021 [23]          | 10 Caribbean countries<br>Most from Trinidad and Tobago<br>(77.6%) | From December 2020 to March 2021                                 | Yes                                  | Few cases or deaths in Trinidad and Tobago |
| Bellini, P. et al. / 2020 [24]          | Italy                                                              | From 2 <sup>nd</sup> to 29 <sup>th</sup> April 2020              | No                                   | First wave; high mortality                 |
| Campos J.A.D.B. et al. / 2021 [25]      | Brazil                                                             | From May 18 <sup>th</sup> to June 13 <sup>th</sup> 2020          | No                                   | Few cases or deaths                        |
| Çelik O.E.; Cansever İ.H. / 2021 [26]   | Turkey                                                             | From September 30 <sup>th</sup> to October 20 <sup>th</sup> 2020 | No                                   | Second wave; rising mortality              |
| Chakraborty, T. et al. / 2020 [27]      | India                                                              | From 1 <sup>st</sup> to 10 <sup>th</sup> May 2020                | No                                   | Few cases or deaths                        |

**Table S2.** Continued.

| First author / Publication year      | Study location                                                                                              | Period of data collection                                       | Vaccination process started (Yes/No) | Pandemic momento                 |
|--------------------------------------|-------------------------------------------------------------------------------------------------------------|-----------------------------------------------------------------|--------------------------------------|----------------------------------|
| Chaudhary F.A. et al. / 2021 [28]    | Pakistan                                                                                                    | From April to July 2020                                         | No                                   | First wave; high mortality       |
| Chen Y.; Li W. / 2021 [29]           | China                                                                                                       | From 3 <sup>rd</sup> to 10 <sup>th</sup> April 2020             | No                                   | Few cases or deaths              |
| Cheng H-C. et al. / 2021 [30]        | Taiwan                                                                                                      | May 2018 / April 2020                                           | No                                   | Few cases or deaths              |
| Collin, V. et al. / 2021 [31]        | United Kingdom                                                                                              | From 22 <sup>nd</sup> to 27 <sup>th</sup> May 2020              | No                                   | First wave; decreasing mortality |
| Consolo, U. et al. / 2020 [32]       | Italy                                                                                                       | From 2 <sup>nd</sup> to 21 <sup>st</sup> April 2020             | No                                   | First wave; high mortality       |
| Cotrin, P. et al. / 2020 [33]        | Brazil                                                                                                      | 2020                                                            | No                                   | Unknown                          |
| De Stefani, A. et al. / 2020 [34]    | Italy                                                                                                       | From 11 <sup>th</sup> to 18 <sup>th</sup> April 2020            | No                                   | First wave; high mortality       |
| Dreher A. et al. / 2021 [35]         | Germany                                                                                                     | From 7 <sup>th</sup> to 14 <sup>th</sup> April 2020             | No                                   | First wave; high mortality       |
| Estrich C.G. et al. / 2021 [36]      | United States                                                                                               | From September 29 <sup>th</sup> to October 8 <sup>th</sup> 2020 | No                                   | Few cases or deaths              |
| Fairozekhan A.T. et al. / 2021 [37]  | 7 Asian countries<br>Most from India (47%)                                                                  | From April 15 <sup>th</sup> to May 5 <sup>th</sup> 2020         | No                                   | Few cases or deaths in India     |
| Ortega-López M.F. et al. / 2021 [38] | 14 Latin American countries<br>Most from Peru (23.7%), Ecuador (21.6%), Venezuela (12,2%) and Brazil (8,6%) | 2020                                                            | No                                   | Unknown                          |
| Gasparro, R. et al. / 2020 [39]      | Italy                                                                                                       | From April 17 <sup>th</sup> to May 3 <sup>rd</sup> 2020         | No                                   | First wave; high mortality       |

**Table S2.** Continued.

| First author / Publication year  | Study location                                                     | Period of data collection                                       | Vaccination process started (Yes/No) | Pandemic moment                                                                                                                                                                                                            |
|----------------------------------|--------------------------------------------------------------------|-----------------------------------------------------------------|--------------------------------------|----------------------------------------------------------------------------------------------------------------------------------------------------------------------------------------------------------------------------|
| Humphris G. et al. / 2021 [40]   | United Kingdom (Scotland)                                          | From August to October 2020                                     | No                                   | Few cases or deaths                                                                                                                                                                                                        |
| Iorga M. et al. / 2021 [41]      | Romania                                                            | From November 18 <sup>th</sup> to December 5 <sup>th</sup> 2020 | No                                   | First wave; high mortality                                                                                                                                                                                                 |
| Kale P. et al. / 2021 [42]       | India                                                              | From September to October 2020                                  | No                                   | First wave; high mortality                                                                                                                                                                                                 |
| Kamal A.T. et al. / 2021 [43]    | Pakistan                                                           | From July 20 <sup>th</sup> to August 5 <sup>th</sup> 2020       | No                                   | Few cases or deaths                                                                                                                                                                                                        |
| Kamran R. et al. / 2021 [44]     | Pakistan                                                           | From 16 <sup>th</sup> to 20 <sup>th</sup> June 2020             | No                                   | First wave; high mortality                                                                                                                                                                                                 |
| Karayürek, F. et al. / 2021 [45] | Turkey                                                             | 2020                                                            | No                                   | Unknown                                                                                                                                                                                                                    |
| Karobari M.I. et al. / 2021 [46] | India, Malaysia, Saudi Arabia, Pakistan, United Kingdom & Cambodia | From February to May 2021                                       | Yes                                  | India: second wave; high mortality<br>Malaysia: first wave; few cases or deaths<br>Saudi Arabia: second wave; low mortality<br>Pakistan: few cases or deaths<br>UK: high mortality<br>Cambodia: first wave; high mortality |
| Khader, Y. et al. / 2020 [47]    | Jordan                                                             | March 2020                                                      | No                                   | Few cases or deaths                                                                                                                                                                                                        |
| Kirli M.C.; Kirli U. / 2021 [48] | Turkey                                                             | 2020: Before and after restarting high-risk procedures          | No                                   | Before and after restarting high-risk procedures                                                                                                                                                                           |
| Labban N. et al. / 2021 [49]     | Saudi Arabia                                                       | From July to August 2020                                        | No                                   | Second wave; decreasing mortality                                                                                                                                                                                          |
| Mahdee, A.F. et al. / 2020 [50]  | Iraq                                                               | From 2 <sup>nd</sup> to 23 <sup>rd</sup> July 2020              | No                                   | Few cases or deaths                                                                                                                                                                                                        |
| Martina, S. et al. / 2020 [51]   | Italy                                                              | From 1 <sup>st</sup> to 6 <sup>th</sup> May 2020                | No                                   | First wave; high mortality                                                                                                                                                                                                 |

**Table S2.** Continued.

| First author / Publication year      | Study location                                           | Period of data collection                                                                                                              | Vaccination process started (Yes/No) | Pandemic moment                                                            |
|--------------------------------------|----------------------------------------------------------|----------------------------------------------------------------------------------------------------------------------------------------|--------------------------------------|----------------------------------------------------------------------------|
| Mekhemar M. et al. / 2021 [52]       | Germany                                                  | From July 2020 to January 2021                                                                                                         | Yes                                  | Second wave; high mortality                                                |
| Mekhemar M. et al. / 2021 [53]       | Germany                                                  | From July to November 2020                                                                                                             | No                                   | Second wave; high mortality                                                |
| Mijiritsky, E. et al. / 2020 [54]    | China, India, Israel, Italy & United Kingdom             | From March 30 <sup>th</sup> to April 12 <sup>th</sup> 2020                                                                             | No                                   | First wave and high mortality in Italy & UK                                |
| Mishra, S. et al. / 2020 [55]        | India                                                    | Phase I: from 20 <sup>th</sup> to 25 <sup>th</sup> March 2020<br>Phase II: from 25 <sup>th</sup> to 30 <sup>th</sup> April 2020        | No                                   | Phase I & II: few cases or deaths                                          |
| Moraes R.R. et al. / 2021 [56]       | Brazil                                                   | From 15 <sup>th</sup> to 24 <sup>th</sup> May 2020                                                                                     | No                                   | Few cases or deaths                                                        |
| Mulla, S. et al. / 2020 [57]         | India                                                    | From March 25 <sup>th</sup> to May 25 <sup>th</sup> 2020                                                                               | No                                   | First wave; low mortality                                                  |
| Nagarajappa R. et al. / 2021 [58]    | India                                                    | From June to August 2020                                                                                                               | No                                   | First wave; high mortality                                                 |
| Nair, A.K.R. et al. / 2020 [59]      | India                                                    | From 8 <sup>th</sup> to 16 <sup>th</sup> April 2020                                                                                    | No                                   | Few cases or deaths                                                        |
| Nallamotheu R. et al. / 2021 [60]    | Saudi Arabia, United Arab Emirates, Oman, Kuwait & Qatar | From April to December 2020                                                                                                            | No                                   | 8 months in multiple countries                                             |
| Olivieri, J.G. et al. / 2021 [61]    | Spain                                                    | Phase I: from March 27 <sup>th</sup> to May 21 <sup>st</sup> 2020<br>Phase II: from May 26 <sup>th</sup> to June 18 <sup>th</sup> 2020 | No                                   | Phase I: first wave; high mortality<br>Phase II: first wave; low mortality |
| Owen C. et al. / 2021 [62]           | United Kingdom (Wales)                                   | From January to February 2021                                                                                                          | Yes                                  | Second wave; peak mortality                                                |
| Özarslan M.; Caliskan S. / 2021 [63] | Turkey                                                   | From March 9 <sup>th</sup> to May 20 <sup>th</sup> 2020                                                                                | No                                   | First wave; low mortality                                                  |
| Pai S. et al. / 2021 [64]            | India                                                    | From April to June 2020                                                                                                                | No                                   | First wave; low mortality                                                  |



**Table S2.** Continued.

| First author / Publication year          | Study location                                                     | Period of data collection                                            | Vaccination process started (Yes/No) | Pandemic moment                                                  |
|------------------------------------------|--------------------------------------------------------------------|----------------------------------------------------------------------|--------------------------------------|------------------------------------------------------------------|
| Popatrao Patil A. et al. / 2021 [65]     | India                                                              | From April to June 2021                                              | Yes                                  | Second wave; high mortality                                      |
| Peixoto K.O. et al. / 2021 [66]          | Brazil                                                             | From May to June 2020                                                | No                                   | First wave; rising mortality                                     |
| Plessas A. et al. / 2021 [67]            | United Kingdom (England)                                           | From June to August 2020                                             | No                                   | Few cases or deaths                                              |
| Prajapati A.S. et al. / 2021 [68]        | India                                                              | From November 25 <sup>th</sup> to December 18 <sup>th</sup> 2020     | No                                   | First wave; low mortality                                        |
| Prasetyo Y.T. et al. / 2021 [69]         | Indonesia                                                          | From August 10 <sup>th</sup> to October 1 <sup>st</sup> 2020         | No                                   | Few cases or deaths                                              |
| Ramesh, M. et al. / 2020 [70]            | India, Saudi Arabia, UAE, Malaysia, US, United Kingdom & Australia | From March 29 <sup>th</sup> to April 3 <sup>rd</sup> 2020            | No                                   | First wave and high mortality only in UK                         |
| Ranka M.S.; Ranka S.R. / 2021 [71]       | United Kingdom                                                     | June 2020                                                            | No                                   | First wave; low mortality                                        |
| Salehiniya H.; Abbaszadeh H. / 2021 [72] | Iran                                                               | From 2 <sup>nd</sup> to 14 <sup>th</sup> May 2020                    | No                                   | Few cases or deaths                                              |
| Sandhu B.K. et al. / 2021 [73]           | United Kingdom                                                     | July 2020                                                            | No                                   | Few cases or deaths                                              |
| Sarapultseva, M. et al. / 2021 [74]      | Russia                                                             | From 1 <sup>st</sup> to 20 <sup>th</sup> September 2020              | No                                   | Few cases or deaths                                              |
| Sarialioglu Gungor A. et al. / 2021 [75] | Turkey                                                             | From 5 <sup>th</sup> to 12 <sup>th</sup> May 2020                    | No                                   | First wave; decreasing mortality                                 |
| Schlenz M.A. et al. / 2021 [76]          | Germany                                                            | From December 14 <sup>th</sup> 2020 to January 23 <sup>rd</sup> 2021 | Yes                                  | Second wave; high mortality                                      |
| Schmidt J. et al. / 2021 [77]            | Czech Republic                                                     | From February 24 <sup>th</sup> to March 9 <sup>th</sup> 2021         | Yes                                  | Questions about first wave (few cases or deaths /high mortality) |

**Table S2.** Continued.

| First author / Publication year            | Study location          | Period of data collection                                  | Vaccination process started (Yes/No) | Pandemic moment                                                                   |
|--------------------------------------------|-------------------------|------------------------------------------------------------|--------------------------------------|-----------------------------------------------------------------------------------|
| Serota K.S. et al. / 2021 [78]             | Hungary                 | 2021                                                       | Yes                                  | Unknown                                                                           |
| Shacham, M. et al. / 2021 [79]             | Israel                  | From March 30 <sup>th</sup> to April 10 <sup>th</sup> 2020 | No                                   | Few cases or deaths                                                               |
| Shetty, A. et al. / 2020 [80]              | India                   | From March to May 2020                                     | No                                   | First wave; low mortality                                                         |
| Singh Y.P. / 2021 [81]                     | Saudi Arabia            | From March to September 2020                               | No                                   | First wave; low mortality                                                         |
| Suryakumari, V.B.P. et al. / 2020 [82]     | India                   | From 9 <sup>th</sup> to 11 <sup>th</sup> May 2020          | No                                   | First wave; low mortality                                                         |
| Tao J. et al. / 2021 [83]                  | China                   | From 3 <sup>rd</sup> to 10 <sup>th</sup> April 2020        | No                                   | Few cases or deaths                                                               |
| Tokuc, B.; Coskunes, F.M. / 2020 [84]      | Turkey                  | From March to April 2020                                   | No                                   | First wave; rising mortality                                                      |
| Turska-Szybka A. et al. / 2021 [85]        | Poland                  | From May to June 2020                                      | No                                   | Few cases or deaths                                                               |
| Tysiąc-Miśta, M.; Dziedzic, A. / 2020 [86] | Poland                  | From 6 <sup>th</sup> to 16 <sup>th</sup> April 2020        | No                                   | Few cases or deaths                                                               |
| Uhlen M.M. et al. / 2021 [87]              | Norway                  | From May to June 2020                                      | No                                   | Few cases or deaths                                                               |
| Upadhyay N. et al. / 2021 [88]             | India                   | 2020                                                       | No                                   | Unknown                                                                           |
| Uziel N. et al. / 2021 [89]                | Israel, Canada & France | From April 18 <sup>th</sup> to June 13 <sup>th</sup> 2020  | No                                   | Few cases or deaths in Israel & Canada<br>First wave and high mortality in France |
| Wajeed S. et al. / 2021 [90]               | Pakistan                | From April to July 2021                                    | Yes                                  | Third and fourth wave                                                             |

**Table S2.** Continued.

| First author / Publication year         | Study location | Period of data collection                                | Vaccination process started (Yes/No) | Pandemic moment            |
|-----------------------------------------|----------------|----------------------------------------------------------|--------------------------------------|----------------------------|
| Yilmaz, H.N.; Ozbilen, E.O. / 2020 [91] | Turkey         | From 6 <sup>th</sup> to 15 <sup>th</sup> June 2020       | No                                   | Few cases or deaths        |
| Yilmaz M. et al. / 2021 [92]            | Turkey         | From April 1 <sup>st</sup> to May 1 <sup>st</sup> 2020   | No                                   | First wave; peak mortality |
| Zeidi I.M.; Zeidi B.M. / 2021 [93]      | Iran           | From April 4 <sup>th</sup> to July 18 <sup>th</sup> 2020 | No                                   | Few cases or deaths        |
| Zhao, S. et al. / 2020 [94]             | China          | From 2 <sup>nd</sup> to 13 <sup>th</sup> May 2020        | No                                   | Few cases or deaths        |

**Table S3.** Vaccination and pandemic moment of the studies on dental patients.

| First author / Publication year       | Study location       | Period of data collection                                | Vaccination process started (Yes/No) | Pandemic moment                  |
|---------------------------------------|----------------------|----------------------------------------------------------|--------------------------------------|----------------------------------|
| Abdulkareem A.A. et al. / 2021 [95]   | Iraq, Egypt & Jordan | From 10 <sup>th</sup> to 24 <sup>th</sup> August 2020    | No                                   | Rising mortality only in Iraq    |
| Arqub S.A. et al. / 2021 [96]         | United States        | From July to October 2020                                | No                                   | Second wave; low mortality       |
| Arslan I.; Aydinoğlu S. / 2021 [97]   | Turkey               | 2021                                                     | Unknown                              | Unknown                          |
| Ashraf A. et al. / 2021 [98]          | India                | From 15 <sup>th</sup> to 31 <sup>st</sup> May 2020       | No                                   | First wave; low mortality        |
| Azevedo Machado B. et al. / 2022 [99] | Brazil               | From 1 <sup>st</sup> to 16 <sup>th</sup> September 2020  | No                                   | First wave; decreasing mortality |
| Berberoğlu B. et al. / 2021 [100]     | Turkey               | From June to September 2020                              | No                                   | Few cases or deaths              |
| Blumer S. et al. / 2021 [101]         | Israel               | From March to April 2020                                 | No                                   | Few cases or deaths              |
| Bustati, N.; Rajeh, N. / 2020 [102]   | Syria                | 2020                                                     | No                                   | Unknown                          |
| Campagnaro, R. et al. / 2020 [103]    | Brazil               | From May 12 <sup>th</sup> to June 9 <sup>th</sup> 2020   | No                                   | First wave; rising mortality     |
| Carrillo-Diaz M. et al. / 2021 [104]  | Spain                | From March 18 <sup>th</sup> to May 15 <sup>th</sup> 2020 | No                                   | First wave; high mortality       |
| Cotrin, P. et al. / 2020 [105]        | Brazil               | 2020                                                     | No                                   | Unknown                          |
| Di Giacomo P. et al. / 2021 [106]     | Italy                | May 2020                                                 | No                                   | First wave; high mortality       |
| Farsi D.; Farsi N. / 2021 [107]       | Saudi Arabia         | June 2020                                                | No                                   | Second wave; peak mortality      |

**Table S3.** Continued.

| First author / Publication year         | Study location | Period of data collection                                                                                               | Vaccination process started (Yes/No) | Pandemic moment                                               |
|-----------------------------------------|----------------|-------------------------------------------------------------------------------------------------------------------------|--------------------------------------|---------------------------------------------------------------|
| Folayan M.O. et al. / 2021 [108]        | Nigeria        | From June 21 <sup>st</sup> to August 6 <sup>th</sup> 2020                                                               | No                                   | First wave; high mortality                                    |
| Gallegati S. et al. / 2021 [109]        | Italy          | From 11 <sup>th</sup> to 18 <sup>th</sup> May 2020                                                                      | No                                   | First wave; high mortality                                    |
| González-Olmo M.J. et al. / 2021 [110]  | Spain          | Time 0: from 1 <sup>st</sup> to 8 <sup>th</sup> March 2020<br>Time 1: from 4 <sup>th</sup> to 11 <sup>th</sup> May 2020 | No                                   | Time 0: no deaths<br>Time 1: first wave; decreasing mortality |
| González-Olmo, M.J. et al. / 2020 [111] | Spain          | From 1 <sup>st</sup> to 8 <sup>th</sup> March 2020                                                                      | No                                   | First wave; no deaths                                         |
| Hajek, A. et al. / 2021 [112]           | Germany        | From 21 <sup>st</sup> to 22 <sup>nd</sup> July 2020                                                                     | No                                   | Few cases or deaths                                           |
| Ibrahim M.S. et al. / 2021 [113]        | Saudi Arabia   | From May to June 2020                                                                                                   | No                                   | First wave; rising mortality                                  |
| Luo Y. / 2021 [114]                     | United States  | From June 2020 to February 2021                                                                                         | No                                   | Few cases or deaths / Second and third wave; high mortality   |
| Majeed M.M. et al. / 2021 [115]         | Pakistan       | May 2020                                                                                                                | No                                   | First wave; high mortality                                    |
| Martina S. et al. / 2021 [116]          | Italy          | May 2020                                                                                                                | No                                   | First wave; high mortality                                    |
| Moffat, R.C. et al. / 2020 [117]        | United States  | May 2020                                                                                                                | No                                   | First wave; decreasing mortality                              |
| Moghadam M.G. et al. / 2021 [118]       | Iran           | From 21 <sup>st</sup> to 27 <sup>th</sup> June 2020                                                                     | No                                   | Few cases or deaths                                           |
| Nardi G.M. et al. / 2021 [119]          | Italy          | From November 1 <sup>st</sup> to December 30 <sup>th</sup> 2020                                                         | No                                   | Second wave; high mortality                                   |
| Nazir M. et al. / 2021 [120]            | Saudi Arabia   | From June to July 2020                                                                                                  | No                                   | Second wave; rising mortality                                 |

**Table S3.** Continued.

| First author / Publication year            | Study location                        | Period of data collection                                                                                                                                    | Vaccination process started (Yes/No) | Pandemic moment                                                                            |
|--------------------------------------------|---------------------------------------|--------------------------------------------------------------------------------------------------------------------------------------------------------------|--------------------------------------|--------------------------------------------------------------------------------------------|
| Olivieri J.G. et al. / 2021 [121]          | Spain                                 | Strict confinement: from March 14 <sup>th</sup> to May 21 <sup>st</sup> 2020<br>Partial confinement: from May 25 <sup>th</sup> to June 18 <sup>th</sup> 2020 | No                                   | Strict confinement: first wave; high mortality<br>Partial confinement: few cases or deaths |
| Olszewska, A.; Rzymiski, P. / 2020 [122]   | Poland                                | 2018 / From March 24 <sup>th</sup> to April 30 <sup>th</sup> 2020                                                                                            | No                                   | Few cases or deaths                                                                        |
| Papautsky E.L. et al. / 2021 [123]         | United States                         | From April 5 <sup>th</sup> to May 5 <sup>th</sup> 2020                                                                                                       | No                                   | First wave; peak mortality                                                                 |
| Pasiga, B.D. / 2020 [124]                  | Indonesia                             | From May 21 <sup>st</sup> to June 13 <sup>th</sup> 2020                                                                                                      | No                                   | Few cases or deaths                                                                        |
| Peloso, R.M. et al. / 2020 [125]           | Brazil                                | April 2020                                                                                                                                                   | No                                   | First wave; low mortality                                                                  |
| Phadraig C.M.G. et al. / 2021 [126]        | Worldwide<br>Most from Europe (40.4%) | From 10 <sup>th</sup> to 31 <sup>st</sup> July 2020                                                                                                          | No                                   | Few cases or deaths                                                                        |
| Pylińska-Dąbrowska, D. et al. / 2020 [127] | Poland                                | From November 2019 to September 2020                                                                                                                         | No                                   | Pre-pandemic / First 6 months; low mortality                                               |
| Quan S. et al. / 2021 [128]                | China                                 | From February 20 <sup>th</sup> to March 5 <sup>th</sup> 2020                                                                                                 | No                                   | First wave; high mortality                                                                 |
| Samuel S.R. et al. / 2021 [129]            | India                                 | From March to June 2020                                                                                                                                      | No                                   | First wave; low mortality                                                                  |
| Sari A.; Bilmez Z.Y. / 2021 [130]          | Turkey                                | From August 1 <sup>st</sup> to October 1 <sup>st</sup> 2020                                                                                                  | No                                   | Second wave; low mortality                                                                 |
| Tatar N.; Karabas A. / 2021 [131]          | Turkey                                | From July to October 2020                                                                                                                                    | No                                   | Few cases or deaths / Second wave; low mortality                                           |
| Vanka S. et al. / 2021 [132]               | Saudi Arabia                          | 2020                                                                                                                                                         | No                                   | Unknown                                                                                    |

**Table S3.** Continued.

| First author / Publication year | Study location | Period of data collection                               | Vaccination process started (Yes/No) | Pandemic moment            |
|---------------------------------|----------------|---------------------------------------------------------|--------------------------------------|----------------------------|
| Vohra P. et al. / 2021 [133]    | India          | From November 2020 to February 2021                     | Yes                                  | First wave; low mortality  |
| Wen Y.F. et al. / 2021 [134]    | China          | From February to March 2020                             | No                                   | First wave; high mortality |
| Wu, Y. et al. / 2021 [135]      | China          | From 19 <sup>th</sup> to 29 <sup>th</sup> February 2020 | No                                   | First wave; high mortality |
| Xiong, X. et al. / 2020 [136]   | China          | From 20 <sup>th</sup> to 22 <sup>nd</sup> February 2020 | No                                   | First wave; high mortality |
| Yavan M.A. / 2021 [137]         | Turkey         | June 2020                                               | No                                   | Few cases or deaths        |

**Table S4.** Quality assessment of studies on dental professionals using the modified Newcastle-Ottawa Scale.

| First author / Publication year        | Selection                           |             | Comparability       |                        | Outcome                        |                                 |                  | Score<br>(*) |
|----------------------------------------|-------------------------------------|-------------|---------------------|------------------------|--------------------------------|---------------------------------|------------------|--------------|
|                                        | Representativeness of<br>the sample | Sample size | Non-<br>respondents | Confounding<br>factors | Assessment of<br>the outcome I | Assessment of<br>the outcome II | Statistical test |              |
| Ahmed M.A. et al. / 2020 [15]          | *                                   |             |                     | **                     | *                              | *                               | *                | 6            |
| Ajwa N. et al. / 2020 [16]             | *                                   | *           | *                   | *                      | *                              | **                              | *                | 8            |
| Aldhuwayhi S. et al. / 2021 [17]       | *                                   |             |                     | *                      | *                              | **                              | *                | 6            |
| Alencar C. de M. et al. / 2021 [18]    | *                                   | *           | *                   | *                      | *                              | **                              | *                | 8            |
| Alkhalifah F.N. et al. / 2021 [19]     | *                                   |             |                     | *                      | *                              | *                               | *                | 5            |
| Aly M.M.; Elchaghabay M.A. / 2020 [20] | *                                   | *           | *                   | *                      | *                              | *                               |                  | 6            |
| Amato A. et al. / 2021 [21]            | *                                   |             |                     | **                     | *                              | *                               | *                | 6            |
| Aurlene N. et al. / 2021 [22]          | *                                   | *           | *                   | *                      | *                              | *                               |                  | 6            |
| Balkaran R. et al. / 2021 [23]         | *                                   |             |                     | *                      | *                              | *                               | *                | 5            |
| Bellini P. et al. / 2020 [24]          | *                                   |             |                     | *                      | *                              | **                              |                  | 5            |
| Campos J.A.D.B. et al. / 2021 [25]     | *                                   |             |                     | *                      | *                              | **                              | *                | 6            |
| Çelik O.E.; Cansever İ.H. / 2021 [26]  | *                                   |             |                     | **                     | *                              | *                               | *                | 6            |
| Chakraborty T. et al. / 2020 [27]      | *                                   |             |                     | **                     | *                              | **                              | *                | 7            |
| Chaudhary F.A. et al. / 2021 [28]      | *                                   |             |                     | **                     | *                              | **                              | *                | 7            |
| Chen Y.; Li W. / 2021 [29]             | *                                   | *           | *                   | **                     | *                              | **                              | *                | 9            |
| Cheng H-C. et al. / 2021 [30]          | *                                   |             |                     | **                     | *                              | *                               | *                | 6            |
| Collin V. et al. / 2021 [31]           | *                                   |             |                     | *                      | *                              | **                              | *                | 6            |
| Consolo U. et al. / 2020 [32]          | *                                   | *           | *                   | *                      | *                              | **                              | *                | 8            |
| Cotrin P. et al. / 2020 [33]           | *                                   | *           | *                   | *                      | *                              | *                               | *                | 7            |
| De Stefani A. et al. / 2020 [34]       | *                                   |             |                     | *                      | *                              | *                               | *                | 5            |
| Dreher A. et al. / 2021 [35]           | *                                   |             |                     | **                     | *                              | **                              | *                | 7            |
| Estrich C.G. et al. / 2021 [36]        | *                                   |             | *                   | *                      | *                              | **                              | *                | 7            |
| Fairozekhan A.T. et al. / 2021 [37]    | *                                   |             | *                   | *                      | *                              | *                               | *                | 6            |
| Ortega-López M.F. et al. / 2021 [38]   |                                     | *           |                     | **                     | *                              | **                              | *                | 7            |
| Gasparro R. et al. / 2020 [39]         | *                                   |             |                     | **                     | *                              | **                              | *                | 7            |
| Humphris G. et al. / 2021 [40]         | *                                   | *           | *                   | *                      | *                              | **                              | *                | 8            |
| Iorga M. et al. / 2021 [41]            | *                                   |             |                     | *                      | *                              | **                              | *                | 6            |
| Kale P. et al. / 2021 [42]             | *                                   |             | *                   | *                      | *                              | **                              | *                | 7            |
| Kamal A.T. et al. / 2021 [43]          | *                                   | *           | *                   | **                     | *                              | **                              | *                | 9            |

(\*) = <5 : Unsatisfactory quality / 5 · 6 : Satisfactory quality / 7 · 8 : Good quality / 9 · 10 : Very Good quality



Table S4. Continued.

| First author / Publication year          | Selection                        |             | Comparability   |                     | Outcome                     |                              | Statistical test | Score ( *) |
|------------------------------------------|----------------------------------|-------------|-----------------|---------------------|-----------------------------|------------------------------|------------------|------------|
|                                          | Representativeness of the sample | Sample size | Non-respondents | Confounding factors | Assessment of the outcome I | Assessment of the outcome II |                  |            |
| Kamran R. et al. / 2021 [44]             | *                                |             |                 | *                   | *                           | *                            | *                | 5          |
| Karayürek F. et al. / 2021 [45]          | *                                |             |                 | *                   | *                           | *                            | *                | 5          |
| Karobari M.I. et al. / 2021 [46]         | *                                |             | *               | *                   | *                           | *                            | *                | 6          |
| Khader Y. et al. / 2020 [47]             | *                                |             |                 | *                   | *                           | *                            | *                | 5          |
| Kirli M.C.; Kirli U. / 2021 [48]         |                                  |             | *               | *                   | *                           | **                           | *                | 6          |
| Labban N. et al. / 2021 [49]             | *                                | *           | *               | *                   | *                           | **                           | *                | 8          |
| Mahdee A.F. et al. / 2020 [50]           | *                                | *           | *               | *                   | *                           | *                            | *                | 7          |
| Martina S. et al. / 2020 [51]            | *                                |             |                 | **                  | *                           | **                           | *                | 7          |
| Mekhemar M. et al. / 2021 [52]           | *                                | *           | *               | **                  | *                           | **                           | *                | 9          |
| Mekhemar M. et al. / 2021 [53]           | *                                | *           | *               | **                  | *                           | **                           | *                | 9          |
| Mijiritsky E. et al. / 2020 [54]         | *                                |             |                 | **                  | *                           | **                           | *                | 7          |
| Mishra S. et al. / 2020 [55]             | *                                | *           | *               | *                   | *                           | **                           | *                | 8          |
| Moraes R.R. et al. / 2021 [56]           | *                                | *           | *               | **                  | *                           | *                            | *                | 8          |
| Mulla S. et al. / 2020 [57]              | *                                |             |                 | *                   | *                           | **                           | *                | 6          |
| Nagarajappa R. et al. / 2021 [58]        | *                                |             |                 | **                  | *                           | **                           | *                | 7          |
| Nair A.K.R. et al. / 2020 [59]           | *                                |             |                 | **                  | *                           | **                           | *                | 7          |
| Nallamothe R. et al. / 2021 [60]         | *                                | *           | *               | *                   | *                           | *                            | *                | 7          |
| Olivieri J.G. et al. / 2021 [61]         |                                  |             | *               | *                   | **                          | **                           | *                | 7          |
| Owen C. et al. / 2021 [62]               | *                                |             |                 | *                   | *                           | *                            |                  | 4          |
| Özarslan M.; Caliskan S. / 2021 [63]     | *                                | *           | *               | *                   | *                           | **                           | *                | 8          |
| Pai S. et al. / 2021 [64]                | *                                | *           | *               | **                  | *                           | *                            | *                | 8          |
| Popatrao Patil A. et al. / 2021 [65]     | *                                |             |                 | *                   | *                           | *                            |                  | 4          |
| Peixoto K.O. et al. / 2021 [66]          | *                                |             |                 | **                  | *                           | **                           | *                | 7          |
| Plessas A. et al. / 2021 [67]            | *                                |             |                 | *                   | *                           | *                            |                  | 4          |
| Prajapati A.S. et al. / 2021 [68]        | *                                |             |                 | *                   | *                           | *                            | *                | 5          |
| Prasetyo Y.T. et al. / 2021 [69]         | *                                |             |                 | **                  | *                           | *                            | *                | 6          |
| Ramesh M. et al. / 2020 [70]             | *                                | *           | *               | *                   | *                           | *                            | *                | 7          |
| Ranka M.S.; Ranka S.R. / 2021 [71]       |                                  | *           | *               | *                   | *                           | **                           | *                | 7          |
| Salehiniya H.; Abbaszadeh H. / 2021 [72] | *                                |             |                 | **                  | *                           | **                           | *                | 7          |
| Sandhu B.K. et al. / 2021 [73]           | *                                |             |                 | *                   | *                           | *                            |                  | 4          |
| Sarapultseva M. et al. / 2021 [74]       |                                  |             |                 | **                  | *                           | **                           | *                | 6          |

( \*) = &lt;5 : Unsatisfactory quality / 5 · 6 : Satisfactory quality / 7 · 8 : Good quality / 9 · 10 : Very Good quality

**Table S4.** Continued.

| First author / Publication year           | Selection                        |             | Non-respondents | Comparability       |                             | Outcome                      |                  | Score ( *) |
|-------------------------------------------|----------------------------------|-------------|-----------------|---------------------|-----------------------------|------------------------------|------------------|------------|
|                                           | Representativeness of the sample | Sample size |                 | Confounding factors | Assessment of the outcome I | Assessment of the outcome II | Statistical test |            |
| Sarialioglu Gungor A. et al. / 2021 [75]  | *                                | *           | *               | *                   | *                           | *                            | *                | 7          |
| Schlenz M.A. et al. / 2021 [76]           | *                                |             |                 | **                  | *                           | *                            | *                | 6          |
| Schmidt J. et al. / 2021 [77]             |                                  | *           | *               | *                   | *                           | *                            |                  | 5          |
| Serota K.S. et al. / 2021 [78]            | *                                |             |                 | **                  | *                           | **                           | *                | 7          |
| Shacham M. et al. / 2021 [79]             | *                                |             |                 | **                  | *                           | **                           | *                | 7          |
| Shetty A. et al. / 2020 [80]              | *                                | *           | *               | *                   | *                           | *                            | *                | 7          |
| Singh Y.P. / 2021 [81]                    | *                                |             |                 | *                   | *                           | *                            | *                | 5          |
| Suryakumari V.B.P. et al. / 2020 [82]     | *                                |             |                 | **                  | *                           | *                            | *                | 6          |
| Tao J. et al. / 2021 [83]                 | *                                | *           | *               | **                  | *                           | **                           | *                | 9          |
| Tokuc B.; Coskunes F.M. / 2020 [84]       | *                                |             |                 | *                   | *                           | *                            | *                | 5          |
| Turska-Szybka A. et al. / 2021 [85]       | *                                |             |                 | *                   | *                           | *                            | *                | 5          |
| Tysi c-Mi sta M.; Dziedzic A. / 2020 [86] | *                                |             |                 | *                   | *                           | *                            | *                | 5          |
| Uhlen M.M. et al. / 2021 [87]             | *                                |             |                 | *                   | *                           | *                            | *                | 5          |
| Upadhyay N. et al. / 2021 [88]            | *                                | *           | *               | **                  | *                           | *                            | *                | 8          |
| Uziel N. et al. / 2021 [89]               | *                                |             |                 | *                   | *                           | **                           | *                | 6          |
| Wajeeh S. et al. / 2021 [90]              | *                                | *           | *               | **                  | *                           | *                            | *                | 8          |
| Yilmaz H.N.; Ozbilen E.O. / 2020 [91]     | *                                |             |                 | *                   | *                           | **                           | *                | 6          |
| Yilmaz M. et al. / 2021 [92]              | *                                |             | *               | **                  | *                           | **                           | *                | 8          |
| Zeidi I.M.; Zeidi B.M. / 2021 [93]        |                                  | *           | *               | **                  | *                           | **                           | *                | 8          |
| Zhao S. et al. / 2020 [94]                | *                                |             |                 | **                  | *                           | **                           | *                | 7          |

( \*) = <5 : Unsatisfactory quality / 5 · 6 : Satisfactory quality / 7 · 8 : Good quality / 9 · 10 : Very Good quality

**Table S5.** Quality assessment of studies on dental patients using the modified Newcastle-Ottawa Scale.

| First author / Publication year        | Selection                           |             | Comparability       |                        | Outcome                        |                                 | Statistical test | Score<br>(*) |
|----------------------------------------|-------------------------------------|-------------|---------------------|------------------------|--------------------------------|---------------------------------|------------------|--------------|
|                                        | Representativeness of<br>the sample | Sample size | Non-<br>respondents | Confounding<br>factors | Assessment of<br>the outcome I | Assessment of<br>the outcome II |                  |              |
| Abdulkareem A.A. et al. / 2021 [95]    | *                                   | *           |                     | **                     | *                              | *                               | *                | 7            |
| Arqub S.A. et al. / 2021 [96]          | *                                   |             | *                   | *                      | *                              | **                              | *                | 7            |
| Arslan I.; Aydinoğlu S. / 2021 [97]    | *                                   | *           | *                   | *                      | *                              | **                              | *                | 8            |
| Ashraf A. et al. / 2021 [98]           | *                                   |             |                     | **                     | *                              | *                               | *                | 6            |
| Azevedo Machado B. et al. / 2021 [99]  | *                                   | *           |                     | **                     | *                              | **                              | *                | 8            |
| Berberoğlu B. et al. / 2021 [100]      |                                     |             |                     | *                      | *                              | **                              | *                | 5            |
| Blumer S. et al. / 2021 [101]          | *                                   |             |                     | **                     | *                              | *                               | *                | 6            |
| Bustati N.; Rajeh N. / 2020 [102]      | *                                   | *           | *                   | *                      | *                              | *                               |                  | 6            |
| Campagnaro R. et al. / 2020 [103]      | *                                   | *           | *                   | *                      | *                              | *                               | *                | 7            |
| Carrillo-Diaz M. et al. / 2021 [104]   |                                     |             | *                   | **                     | *                              | **                              | *                | 7            |
| Cotrin P. et al. / 2020 [105]          |                                     |             | *                   | *                      | *                              | **                              | *                | 6            |
| Di Giacomo P. et al. / 2021 [106]      |                                     |             |                     | *                      | *                              | **                              | *                | 5            |
| Farsi D.; Farsi N. / 2021 [107]        | *                                   |             |                     | **                     | *                              | *                               | *                | 6            |
| Folayan M.O. et al. / 2021 [108]       | *                                   | *           | *                   | **                     | *                              | **                              | *                | 9            |
| Gallegati S. et al. / 2021 [109]       | *                                   |             |                     | **                     | *                              | *                               | *                | 6            |
| González-Olmo M.J. et al. / 2021 [110] | *                                   |             | *                   | **                     | *                              | **                              | *                | 8            |
| González-Olmo M.J. et al. / 2020 [111] |                                     |             |                     | *                      | *                              | **                              | *                | 5            |
| Hajek A. et al. / 2021 [112]           | *                                   |             | *                   | **                     | *                              | *                               | *                | 7            |
| Ibrahim M.S. et al. / 2021 [113]       | *                                   | *           | *                   | **                     | *                              | **                              | *                | 9            |
| Luo Y. / 2021 [114]                    | *                                   |             |                     | **                     | *                              | **                              | *                | 7            |
| Majeed M.M. et al. / 2021 [115]        | *                                   | *           | *                   | *                      | *                              | *                               | *                | 7            |
| Martina S. et al. / 2021 [116]         | *                                   |             |                     | **                     | *                              | **                              | *                | 7            |
| Moffat R.C. et al. / 2020 [117]        | *                                   |             |                     | **                     | *                              | *                               | *                | 6            |
| Moghadam M.G. et al. / 2021 [118]      |                                     | *           | *                   | *                      | *                              | **                              | *                | 7            |
| Nardi G.M. et al. / 2021 [119]         | *                                   |             |                     | **                     | *                              | *                               | *                | 6            |
| Nazir M. et al. / 2021 [120]           | *                                   | *           | *                   | **                     | *                              | **                              | *                | 9            |
| Olivieri J.G. et al. / 2021 [121]      | *                                   | *           | *                   | *                      | *                              | **                              | *                | 8            |
| Olszewska A.; Rzymiski P. / 2020 [122] |                                     | *           |                     | *                      | *                              | *                               | *                | 5            |
| Papautsky E.L. et al. / 2021 [123]     | *                                   |             |                     | **                     | *                              | *                               | *                | 6            |
| Pasiga B.D. / 2020 [124]               | *                                   |             |                     | *                      | *                              | *                               | *                | 5            |
| Peloso R.M. et al. / 2020 [125]        |                                     | *           | *                   | *                      | *                              | *                               | *                | 6            |

(\*) = <5 : Unsatisfactory quality / 5 · 6 : Satisfactory quality / 7 · 8 : Good quality / 9 · 10 : Very Good quality

**Table S5.** Continued.

| First author / Publication year           | Selection                        |             | Comparability   |                     | Outcome                     |                              |                  | Score ( *) |
|-------------------------------------------|----------------------------------|-------------|-----------------|---------------------|-----------------------------|------------------------------|------------------|------------|
|                                           | Representativeness of the sample | Sample size | Non-respondents | Confounding factors | Assessment of the outcome I | Assessment of the outcome II | Statistical test |            |
| Phadraig C.M.G. et al. / 2021 [126]       | *                                |             |                 | *                   | *                           | *                            | *                | 5          |
| Pylińska-Dąbrowska D. et al. / 2020 [127] |                                  |             |                 | *                   | *                           | **                           | *                | 5          |
| Quan S. et al. / 2021 [128]               | *                                |             |                 | **                  | *                           | **                           | *                | 7          |
| Samuel S.R. et al. / 2021 [129]           | *                                | *           | *               | **                  | *                           | **                           | *                | 9          |
| Sari A.; Bilmez Z.Y. / 2021 [130]         | *                                | *           | *               | **                  | *                           | **                           | *                | 9          |
| Tatar N.; Karabas A. / 2021 [131]         |                                  |             |                 | *                   | *                           | *                            | *                | 4          |
| Vanka S. et al. / 2021 [132]              |                                  |             | *               | *                   | *                           | *                            | *                | 5          |
| Vohra P. et al. / 2021 [133]              | *                                |             |                 | *                   | *                           | *                            | *                | 5          |
| Wen Y.F. et al. / 2021 [134]              |                                  |             |                 | **                  | *                           | **                           | *                | 6          |
| Wu Y. et al. / 2021 [135]                 | *                                |             |                 | **                  | *                           | **                           | *                | 7          |
| Xiong X. et al. / 2020 [136]              |                                  |             |                 | **                  | *                           | **                           | *                | 6          |
| Yavan M.A. / 2021 [137]                   |                                  |             | *               | *                   | *                           | **                           | *                | 6          |

( \*) = <5 : Unsatisfactory quality / 5 · 6 : Satisfactory quality / 7 · 8 : Good quality / 9 · 10 : Very Good quality
